# Supplementary material for: A wholly biological method for galactaric acid production from pectin by the combination of enzymatic hydrolysis and resting-cell catalysis
Source: Royal Society of Chemistry journal article supplement (doi:10.1039/d2gc00821a), 2022-01-01

## Supporting information:

**S. Figure 1.** The chromatogram of the whole-cell catalysis of electrodialysis treatment hydrolysate

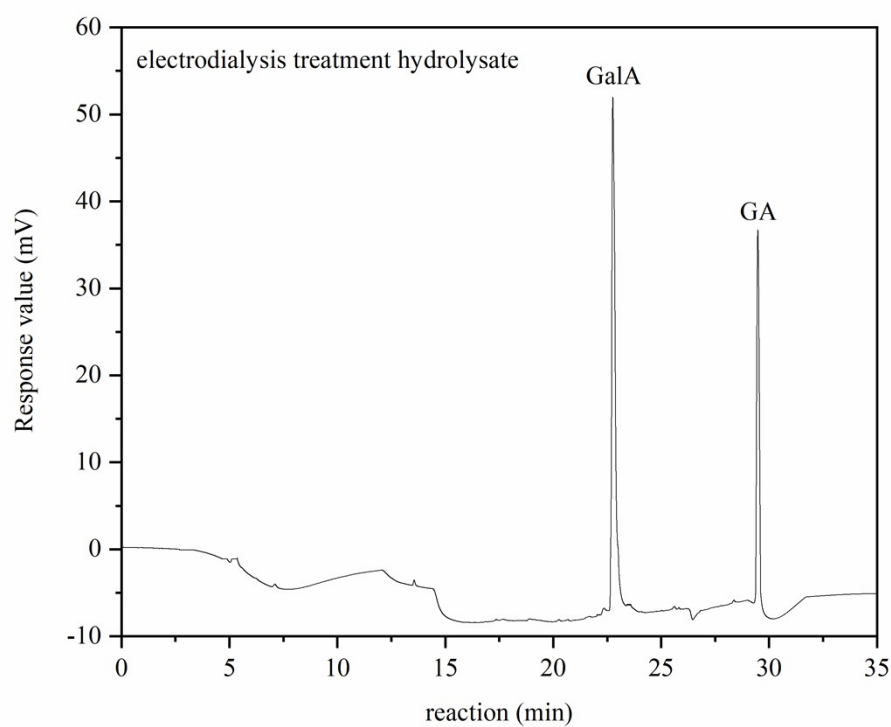

**S. Figure.2** The chromatogram of the whole-cell catalysis of original enzymatic hydrolysate

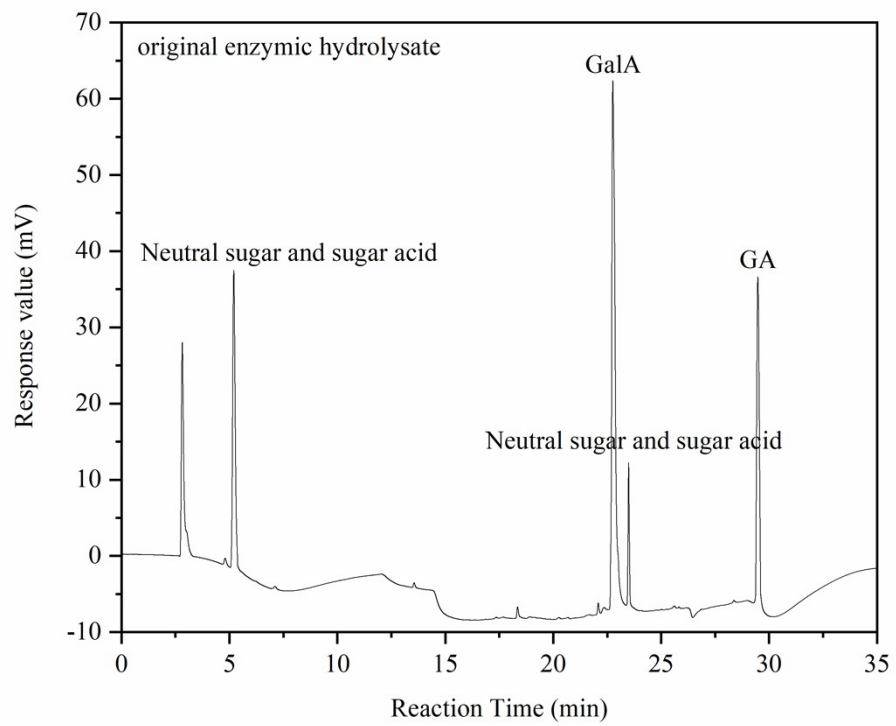

Supplement: d2gc00821a1.pdf [file d2gc00821a1.pdf]
